# Supplementary material
Source: PubMed Central journal article supplement (PMC5005107)
Supplement: NIHMS791237-supplement-Table_S2.pdf [file NIHMS791237-supplement-Table_S2.pdf]

**Table S2.** Top associations between symptomatic (VL) or asymptomatic (DTH+) phenotypes and SNPs under linkage regions on chromosomes 9, 15 and 19. VL and DTH positive phenotypes were analysed as qualitative traits using LAMP. LOD and P-values indicate raw outputs from the program. The total number of LD blocks (961) was used to determine the modified Bonferroni corrected p-value. Locations of SNPs relative to genes, and their position relative to those gene, were based on proximity in the UCSC hg18 version of the human genome.

| Region | SNP        | Trait | LOD  | Pvalue   | correctedPval | location       | relative   |
|--------|------------|-------|------|----------|---------------|----------------|------------|
| chr9   | rs1470217  | VL    | 4.23 | 5.9E-05  | 0.057         | TMEM215 APTX   | intergenic |
| chr9   | rs1404195  | VL    | 3.48 | 3.30E-04 | 0.317         | TMEM2          | upstream   |
| chr9   | rs4879899  | VL    | 3.34 | 4.50E-04 | 0.432         | ATP8B5P        | intron     |
| chr9   | rs16932295 | VL    | 3.34 | 4.60E-04 | 0.442         | UNC13B         | intron     |
| chr9   | rs4879884  | VL    | 3.27 | 5.40E-04 | 0.519         | UNC13B         | intron     |
| chr9   | rs872077   | VL    | 3.22 | 6.00E-04 | 0.577         | PIP5K1B PRKACG | intergenic |
| chr9   | rs1880329  | VL    | 3.01 | 9.80E-04 | 0.942         | TMEM2          | upstream   |

| Region | SNP        | Trait | LOD  | Pvalue   | correctedPval | location  | relative |
|--------|------------|-------|------|----------|---------------|-----------|----------|
| chr15  | rs7176637  | VL    | 3.57 | 2.70E-04 | 0.259         | C15orf60  | intron   |
| chr15  | rs2680344  | VL    | 3.34 | 4.60E-04 | 0.442         | HCN4      | intron   |
| chr15  | rs10852160 | VL    | 3.12 | 7.50E-04 | 0.721         | SLCO3A1   | upstream |
| chr15  | rs8027238  | VL    | 3.02 | 9.60E-04 | 0.923         | KIAA1199  | intron   |
| chr15  | rs16975142 | VL    | 2.93 | 1.20E-03 | 1.153         | LOC145820 | upstream |

| Region | SNP        | Trait | LOD  | Pvalue   | correctedPval | location | relative   |
|--------|------------|-------|------|----------|---------------|----------|------------|
| chr19  | rs8107014  | VL    | 4.85 | 1.40E-05 | 0.013         | LTBP4    | intron     |
| chr19  | rs7259067  | VL    | 3.85 | 1.40E-04 | 0.135         | LTBP4    | intron     |
| chr19  | rs11083560 | VL    | 3.54 | 2.90E-04 | 0.279         | LTBP4    | intron     |
| chr19  | rs2278242  | VL    | 3.51 | 3.10E-04 | 0.298         | LTBP4    | intron     |
| chr19  | rs2190837  | VL    | 3.37 | 4.20E-04 | 0.404         | PSG5     | intron     |
| chr19  | rs7246771  | VL    | 3.11 | 7.70E-04 | 0.740         | PSG11    | downstream |
| chr19  | rs1864074  | VL    | 3.1  | 7.90E-04 | 0.759         | LTBP4    | intron     |

| Region | SNP        | Trait        | LOD  | Pvalue   | correctedPval | location     | relative   |
|--------|------------|--------------|------|----------|---------------|--------------|------------|
| chr15  | rs12324805 | DTH positive | 3.69 | 2.00E-04 | 0.192         | MEX3B EFTUD1 | intron     |
| chr15  | rs1266489  | DTH positive | 3.25 | 5.60E-04 | 0.538         | MAN2A2       | intron     |
| chr15  | rs11072603 | DTH positive | 3.07 | 8.60E-04 | 0.826         | SCAPER       | intron     |
| chr15  | rs11073021 | DTH positive | 2.92 | 1.20E-03 | 1.153         | TMC3B MEX3B  | intergenic |
| chr15  | rs6494904  | DTH positive | 2.77 | 1.70E-03 | 1.634         | THSD4        | intron     |

| Region | SNP        | Trait        | LOD  | Pvalue   | correctedPval | location | relative |
|--------|------------|--------------|------|----------|---------------|----------|----------|
| chr19  | rs10402740 | DTH positive | 3.68 | 2.10E-04 | 0.202         | MAP3K10  | intron   |
| chr19  | rs1010104  | DTH positive | 3.57 | 2.70E-04 | 0.259         | BAX      | intron   |
| chr19  | rs204538   | DTH positive | 3.44 | 3.70E-04 | 0.356         | ZNF229   | upstream |
| chr19  | rs2355720  | DTH positive | 3.43 | 3.80E-04 | 0.365         | FCGBP    | intron   |
| chr19  | rs1129156  | DTH positive | 3.2  | 6.30E-04 | 0.605         | MAP3K10  | exon     |

| Region | SNP        | Trait        | LOD  | Pvalue   | correctedPval | location           | relative   |
|--------|------------|--------------|------|----------|---------------|--------------------|------------|
| chr9   | rs6475870  | DTH positive | 3.53 | 2.90E-04 | 0.279         | TUSC1 LOC100506422 | intergenic |
| chr9   | rs10967916 | DTH positive | 2.8  | 1.60E-03 | 1.538         | MOB3B              | intron     |
| chr9   | rs10757915 | DTH positive | 2.64 | 2.30E-03 | 2.210         | LINGO2             | upstream   |
| chr9   | rs4879913  | DTH positive | 2.54 | 2.90E-03 | 2.787         | CD72               | intron     |
| chr9   | rs2298311  | DTH positive | 2.38 | 4.20E-03 | 4.036         | KIAA1045           | 3' utr     |
